# Supplementary material
Source: publisher site journal article supplement (http://www.kjim.org/upload/media/kjim-2020-064-suppl1.pdf)
Supplement: Supplementary file 1 [file kjim-2020-064-suppl1.pdf]

**Supplementary Table 1. Comparison of VAT, SAT, and SMA according to the presence of comorbidities in patients with AAV**

| Variable         | VAT (n = 117) |              |         | SAT (n = 117) |              |         | SMA (n = 117) |              |         |
|------------------|---------------|--------------|---------|---------------|--------------|---------|---------------|--------------|---------|
|                  | High (n = 58) | Low (n = 59) | p value | High (n = 58) | Low (n = 59) | p value | High (n = 58) | Low (n = 59) | p value |
| HTN (+)          | 34 (58.6)     | 12 (20.3)    | < 0.001 | 26 (44.8)     | 20 (33.9)    | 0.228   | 26 (44.8)     | 20 (33.9)    | 0.228   |
| HTN (-)          | 24 (41.4)     | 47 (79.7)    |         | 32 (55.2)     | 39 (66.1)    |         | 32 (55.2)     | 39 (66.1)    |         |
| DM (+)           | 15 (25.9)     | 8 (13.6)     | 0.096   | 14 (24.1)     | 9 (15.3)     | 0.229   | 12 (20.7)     | 11 (18.6)    | 0.782   |
| DM (-)           | 43 (74.1)     | 51 (86.4)    |         | 44 (75.9)     | 50 (84.7)    |         | 46 (79.3)     | 48 (81.4)    |         |
| Dyslipidemia (+) | 6 (10.3)      | 2 (3.4)      | 0.163   | 5 (8.6)       | 3 (5.1)      | 0.490   | 2 (3.4)       | 6 (10.2)     | 0.272   |
| Dyslipidemia (-) | 52 (89.7)     | 57 (96.6)    |         | 53 (91.4)     | 56 (94.9)    |         | 56 (96.6)     | 53 (89.8)    |         |

Values are expressed as number (%).

VAT, visceral adipose tissue; SAT, subcutaneous adipose tissue; SMA, skeletal muscle area; AAV, anti-neutrophil cytoplasmic antibody-associated vasculitis; HTN, hypertension; DM, diabetes mellitus.
